# Supplementary material
Source: publisher figshare collection journal article supplement (https://acs.figshare.com/ndownloader/files/5117647)
Supplement: Supplementary file 1 [file 5117647]

  
data_rf101m 
  
_audit_creation_method            SHELXL-97 
_chemical_name_systematic 
; 
 ? 
; 
_chemical_name_common             ? 
_chemical_melting_point           ? 
_chemical_formula_moiety          ? 
_chemical_formula_sum 
 'C56 H80 N2 O4 Zn' 
_chemical_formula_weight          910.59 
  
loop_ 
 _atom_type_symbol 
 _atom_type_description 
 _atom_type_scat_dispersion_real 
 _atom_type_scat_dispersion_imag 
 _atom_type_scat_source 
 'C'  'C'   0.0033   0.0016 
 'International Tables Vol C Tables 4.2.6.8 and 6.1.1.4' 
 'H'  'H'   0.0000   0.0000 
 'International Tables Vol C Tables 4.2.6.8 and 6.1.1.4' 
 'O'  'O'   0.0106   0.0060 
 'International Tables Vol C Tables 4.2.6.8 and 6.1.1.4' 
 'N'  'N'   0.0061   0.0033 
 'International Tables Vol C Tables 4.2.6.8 and 6.1.1.4' 
 'Zn'  'Zn'   0.2839   1.4301 
 'International Tables Vol C Tables 4.2.6.8 and 6.1.1.4' 
  
_symmetry_cell_setting            Triclinic 
_symmetry_space_group_name_H-M    P-1 
  
loop_ 
 _symmetry_equiv_pos_as_xyz 
 'x, y, z' 
 '-x, -y, -z' 
  
_cell_length_a                    11.747(3) 
_cell_length_b                    12.235(3) 
_cell_length_c                    20.608(6) 
_cell_angle_alpha                 83.463(5) 
_cell_angle_beta                  73.939(5) 
_cell_angle_gamma                 75.432(4) 
_cell_volume                      2751.7(13) 
_cell_formula_units_Z             2 
_cell_measurement_temperature     173(2) 
_cell_measurement_reflns_used     ? 
_cell_measurement_theta_min       ? 
_cell_measurement_theta_max       ? 
  
_exptl_crystal_description        plates 
_exptl_crystal_colour             green
_exptl_crystal_size_max           0.40 
_exptl_crystal_size_mid           0.20 
_exptl_crystal_size_min           0.08 
_exptl_crystal_density_diffrn     1.099 
_exptl_crystal_F_000              984 
_exptl_absorpt_coefficient_mu     0.489 
_exptl_absorpt_correction_type    multi-scan
_exptl_absorpt_correction_T_min   0.8285 
_exptl_absorpt_correction_T_max   0.9620 
_exptl_absorpt_process_details    ? 
  
_exptl_special_details 
; 
 ? 
; 
  
_diffrn_ambient_temperature       173(2) 
_diffrn_radiation_wavelength      0.71073 
_diffrn_radiation_type            MoK\a 
_diffrn_radiation_source          'fine-focus sealed tube' 
_diffrn_radiation_monochromator   graphite 
_diffrn_measurement_device_type   'CCD area detector' 
_diffrn_measurement_method        'phi and omega scans' 
_diffrn_detector_area_resol_mean  ? 
_diffrn_standards_number          ? 
_diffrn_standards_interval_count  ? 
_diffrn_standards_interval_time   ? 
_diffrn_standards_decay_%         ? 
_diffrn_reflns_number             12659 
_diffrn_reflns_av_R_equivalents   0.0695 
_diffrn_reflns_av_sigmaI/netI     0.1007 
_diffrn_reflns_limit_h_min        -11 
_diffrn_reflns_limit_h_max        11 
_diffrn_reflns_limit_k_min        -12 
_diffrn_reflns_limit_k_max        12 
_diffrn_reflns_limit_l_min        -20 
_diffrn_reflns_limit_l_max        20 
_diffrn_reflns_theta_min          1.72 
_diffrn_reflns_theta_max          20.82 
_reflns_number_total              5702 
_reflns_number_gt                 3582 
_reflns_threshold_expression      >2sigma(I) 
  
_computing_data_collection        'Bruker SMART' 
_computing_cell_refinement        'Bruker SMART' 
_computing_data_reduction         'Bruker SAINT' 
_computing_structure_solution     'SHELXS-97 (Sheldrick, 1990)' 
_computing_structure_refinement   'SHELXL-97 (Sheldrick, 1997)' 
_computing_molecular_graphics     'Bruker SHELXTL' 
_computing_publication_material   'Bruker SHELXTL' 
  
_refine_special_details 
; 
 Refinement of F^2^ against ALL reflections.  The weighted R-factor wR and 
 goodness of fit S are based on F^2^, conventional R-factors R are based 
 on F, with F set to zero for negative F^2^. The threshold expression of 
 F^2^ > 2sigma(F^2^) is used only for calculating R-factors(gt) etc. and is 
 not relevant to the choice of reflections for refinement.  R-factors based 
 on F^2^ are statistically about twice as large as those based on F, and R- 
 factors based on ALL data will be even larger. 
; 
  
_refine_ls_structure_factor_coef  Fsqd 
_refine_ls_matrix_type            full 
_refine_ls_weighting_scheme       calc 
_refine_ls_weighting_details 
 'calc w=1/[\s^2^(Fo^2^)+(0.0800P)^2^+0.0000P] where P=(Fo^2^+2Fc^2^)/3' 
_atom_sites_solution_primary      direct 
_atom_sites_solution_secondary    difmap 
_atom_sites_solution_hydrogens    geom 
_refine_ls_hydrogen_treatment     constr
_refine_ls_extinction_method      SHELXL 
_refine_ls_extinction_coef        0.0066(8) 
_refine_ls_extinction_expression 
 'Fc^*^=kFc[1+0.001xFc^2^\l^3^/sin(2\q)]^-1/4^' 
_refine_ls_number_reflns          5702 
_refine_ls_number_parameters      569 
_refine_ls_number_restraints      0 
_refine_ls_R_factor_all           0.0951 
_refine_ls_R_factor_gt            0.0600 
_refine_ls_wR_factor_ref          0.1687 
_refine_ls_wR_factor_gt           0.1444 
_refine_ls_goodness_of_fit_ref    1.028 
_refine_ls_restrained_S_all       1.028 
_refine_ls_shift/su_max           0.000 
_refine_ls_shift/su_mean          0.000 
  
loop_ 
 _atom_site_label 
 _atom_site_type_symbol 
 _atom_site_fract_x 
 _atom_site_fract_y 
 _atom_site_fract_z 
 _atom_site_U_iso_or_equiv 
 _atom_site_adp_type 
 _atom_site_occupancy 
 _atom_site_symmetry_multiplicity 
 _atom_site_calc_flag 
 _atom_site_refinement_flags 
 _atom_site_disorder_assembly 
 _atom_site_disorder_group 
Zn Zn 0.76578(6) 0.73090(5) 0.75149(3) 0.0433(3) Uani 1 1 d . . . 
O1 O 0.6595(3) 0.8957(3) 0.75385(19) 0.0477(10) Uani 1 1 d . . . 
O2 O 0.9148(3) 0.7831(3) 0.75868(19) 0.0465(10) Uani 1 1 d . . . 
O3 O 0.8255(3) 0.5693(3) 0.79043(19) 0.0440(10) Uani 1 1 d . . . 
O4 O 0.6629(3) 0.6720(3) 0.70370(19) 0.0455(10) Uani 1 1 d . . . 
N1 N 0.6592(3) 0.7376(3) 0.8518(2) 0.0331(10) Uani 1 1 d . . . 
N4 N 0.8663(4) 0.7368(3) 0.6491(2) 0.0341(10) Uani 1 1 d . . . 
C1 C 0.5697(5) 0.8318(4) 0.8645(3) 0.0360(13) Uani 1 1 d . . . 
C2 C 0.4725(5) 0.8589(4) 0.9242(3) 0.0388(14) Uani 1 1 d . . . 
H2A H 0.4669 0.8053 0.9615 0.047 Uiso 1 1 calc R . . 
C3 C 0.3879(4) 0.9585(4) 0.9294(3) 0.0382(14) Uani 1 1 d . . . 
C4 C 0.3965(5) 1.0383(4) 0.8730(3) 0.0416(14) Uani 1 1 d . . . 
H4A H 0.3365 1.1075 0.8771 0.050 Uiso 1 1 calc R . . 
C5 C 0.4845(5) 1.0222(4) 0.8139(3) 0.0390(14) Uani 1 1 d . . . 
C6 C 0.5756(5) 0.9155(4) 0.8085(3) 0.0387(14) Uani 1 1 d . . . 
C7 C 0.2834(4) 0.9871(4) 0.9927(3) 0.0408(14) Uani 1 1 d . . . 
C8 C 0.3032(5) 0.9063(5) 1.0533(3) 0.0620(18) Uani 1 1 d . . . 
H8A H 0.3783 0.9110 1.0636 0.093 Uiso 1 1 calc R . . 
H8B H 0.3097 0.8287 1.0422 0.093 Uiso 1 1 calc R . . 
H8C H 0.2342 0.9275 1.0926 0.093 Uiso 1 1 calc R . . 
C9 C 0.2695(5) 1.1079(5) 1.0138(3) 0.0616(18) Uani 1 1 d . . . 
H9A H 0.3451 1.1137 1.0231 0.092 Uiso 1 1 calc R . . 
H9B H 0.2023 1.1242 1.0545 0.092 Uiso 1 1 calc R . . 
H9C H 0.2523 1.1625 0.9771 0.092 Uiso 1 1 calc R . . 
C10 C 0.1652(5) 0.9787(5) 0.9779(3) 0.0584(17) Uani 1 1 d . . . 
H10A H 0.1734 0.9019 0.9649 0.088 Uiso 1 1 calc R . . 
H10B H 0.1487 1.0328 0.9409 0.088 Uiso 1 1 calc R . . 
H10C H 0.0977 0.9958 1.0185 0.088 Uiso 1 1 calc R . . 
C11 C 0.4942(5) 1.1104(4) 0.7550(3) 0.0450(15) Uani 1 1 d . . . 
C12 C 0.3864(5) 1.2133(4) 0.7694(3) 0.0582(17) Uani 1 1 d . . . 
H12A H 0.3103 1.1893 0.7758 0.087 Uiso 1 1 calc R . . 
H12B H 0.3951 1.2688 0.7312 0.087 Uiso 1 1 calc R . . 
H12C H 0.3848 1.2476 0.8105 0.087 Uiso 1 1 calc R . . 
C13 C 0.6123(5) 1.1498(5) 0.7454(3) 0.0602(17) Uani 1 1 d . . . 
H13A H 0.6821 1.0848 0.7358 0.090 Uiso 1 1 calc R . . 
H13B H 0.6102 1.1836 0.7867 0.090 Uiso 1 1 calc R . . 
H13C H 0.6202 1.2059 0.7075 0.090 Uiso 1 1 calc R . . 
C14 C 0.4950(5) 1.0617(5) 0.6892(3) 0.0571(17) Uani 1 1 d . . . 
H14A H 0.5622 0.9948 0.6791 0.086 Uiso 1 1 calc R . . 
H14B H 0.5055 1.1189 0.6520 0.086 Uiso 1 1 calc R . . 
H14C H 0.4177 1.0404 0.6947 0.086 Uiso 1 1 calc R . . 
C15 C 0.9623(5) 0.7822(4) 0.6388(3) 0.0405(14) Uani 1 1 d . . . 
C16 C 1.0434(5) 0.8105(4) 0.5771(3) 0.0482(15) Uani 1 1 d . . . 
H16A H 1.0311 0.7956 0.5357 0.058 Uiso 1 1 calc R . . 
C17 C 1.1376(5) 0.8579(5) 0.5750(3) 0.0489(15) Uani 1 1 d . . . 
C18 C 1.1534(5) 0.8790(4) 0.6385(3) 0.0484(15) Uani 1 1 d . . . 
H18A H 1.2203 0.9105 0.6370 0.058 Uiso 1 1 calc R . . 
C19 C 1.0829(5) 0.8589(4) 0.7001(3) 0.0436(15) Uani 1 1 d . . . 
C20 C 0.9834(5) 0.8072(4) 0.7018(3) 0.0412(14) Uani 1 1 d . . . 
C21 C 1.1025(5) 0.8872(5) 0.7660(3) 0.0542(16) Uani 1 1 d . . . 
C22 C 1.1254(5) 0.7810(5) 0.8122(3) 0.0640(18) Uani 1 1 d . . . 
H22A H 1.1975 0.7263 0.7888 0.096 Uiso 1 1 calc R . . 
H22B H 1.0545 0.7473 0.8238 0.096 Uiso 1 1 calc R . . 
H22C H 1.1388 0.8016 0.8537 0.096 Uiso 1 1 calc R . . 
C23 C 1.2108(6) 0.9422(6) 0.7526(3) 0.080(2) Uani 1 1 d . . . 
H23A H 1.2849 0.8900 0.7289 0.120 Uiso 1 1 calc R . . 
H23B H 1.2207 0.9599 0.7956 0.120 Uiso 1 1 calc R . . 
H23C H 1.1962 1.0120 0.7246 0.120 Uiso 1 1 calc R . . 
C24 C 0.9886(5) 0.9719(5) 0.8029(3) 0.0687(19) Uani 1 1 d . . . 
H24A H 0.9173 0.9395 0.8113 0.103 Uiso 1 1 calc R . . 
H24B H 0.9767 1.0420 0.7748 0.103 Uiso 1 1 calc R . . 
H24C H 0.9991 0.9883 0.8460 0.103 Uiso 1 1 calc R . . 
C25 C 1.2241(5) 0.8884(5) 0.5092(3) 0.0590(17) Uani 1 1 d . . . 
C26 C 1.1882(7) 0.8664(7) 0.4469(3) 0.103(3) Uani 1 1 d . . . 
H26A H 1.1058 0.9111 0.4481 0.154 Uiso 1 1 calc R . . 
H26B H 1.1903 0.7859 0.4467 0.154 Uiso 1 1 calc R . . 
H26C H 1.2456 0.8882 0.4060 0.154 Uiso 1 1 calc R . . 
C27 C 1.2231(7) 1.0139(6) 0.5052(4) 0.094(2) Uani 1 1 d . . . 
H27A H 1.2456 1.0317 0.5445 0.140 Uiso 1 1 calc R . . 
H27B H 1.1414 1.0587 0.5049 0.140 Uiso 1 1 calc R . . 
H27C H 1.2817 1.0318 0.4637 0.140 Uiso 1 1 calc R . . 
C28 C 1.3532(6) 0.8198(6) 0.5061(3) 0.093(2) Uani 1 1 d . . . 
H28A H 1.3772 0.8333 0.5458 0.140 Uiso 1 1 calc R . . 
H28B H 1.4093 0.8428 0.4650 0.140 Uiso 1 1 calc R . . 
H28C H 1.3561 0.7392 0.5053 0.140 Uiso 1 1 calc R . . 
C29 C 0.6908(4) 0.6463(4) 0.8926(3) 0.0378(14) Uani 1 1 d . . . 
C30 C 0.6480(4) 0.6296(4) 0.9631(3) 0.0372(13) Uani 1 1 d . . . 
H30A H 0.5874 0.6881 0.9876 0.045 Uiso 1 1 calc R . . 
C31 C 0.6899(5) 0.5337(4) 0.9971(3) 0.0384(13) Uani 1 1 d . . . 
C32 C 0.7832(5) 0.4481(4) 0.9586(3) 0.0432(14) Uani 1 1 d . . . 
H32A H 0.8127 0.3808 0.9827 0.052 Uiso 1 1 calc R . . 
C33 C 0.8333(5) 0.4546(4) 0.8907(3) 0.0417(14) Uani 1 1 d . . . 
C34 C 0.7855(5) 0.5581(4) 0.8540(3) 0.0348(13) Uani 1 1 d . . . 
C35 C 0.6456(5) 0.5141(5) 1.0735(3) 0.0447(15) Uani 1 1 d . . . 
C36 C 0.5290(5) 0.6009(5) 1.1033(3) 0.0635(18) Uani 1 1 d . . . 
H36A H 0.5439 0.6771 1.0938 0.095 Uiso 1 1 calc R . . 
H36B H 0.5034 0.5863 1.1523 0.095 Uiso 1 1 calc R . . 
H36C H 0.4647 0.5949 1.0830 0.095 Uiso 1 1 calc R . . 
C37 C 0.7460(5) 0.5236(5) 1.1053(3) 0.0605(17) Uani 1 1 d . . . 
H37A H 0.7623 0.5993 1.0947 0.091 Uiso 1 1 calc R . . 
H37B H 0.8203 0.4668 1.0870 0.091 Uiso 1 1 calc R . . 
H37C H 0.7196 0.5109 1.1544 0.091 Uiso 1 1 calc R . . 
C38 C 0.6193(5) 0.3961(5) 1.0903(3) 0.0544(16) Uani 1 1 d . . . 
H38A H 0.5558 0.3899 1.0694 0.082 Uiso 1 1 calc R . . 
H38B H 0.5917 0.3842 1.1394 0.082 Uiso 1 1 calc R . . 
H38C H 0.6937 0.3388 1.0728 0.082 Uiso 1 1 calc R . . 
C39 C 0.9306(5) 0.3614(4) 0.8511(3) 0.0483(15) Uani 1 1 d . . . 
C40 C 0.9789(6) 0.2645(5) 0.8990(3) 0.077(2) Uani 1 1 d . . . 
H40A H 0.9114 0.2324 0.9265 0.115 Uiso 1 1 calc R . . 
H40B H 1.0150 0.2944 0.9287 0.115 Uiso 1 1 calc R . . 
H40C H 1.0407 0.2055 0.8722 0.115 Uiso 1 1 calc R . . 
C41 C 1.0410(5) 0.4073(5) 0.8097(3) 0.0605(17) Uani 1 1 d . . . 
H41A H 1.0148 0.4690 0.7785 0.091 Uiso 1 1 calc R . . 
H41B H 1.1021 0.3465 0.7839 0.091 Uiso 1 1 calc R . . 
H41C H 1.0765 0.4356 0.8403 0.091 Uiso 1 1 calc R . . 
C42 C 0.8776(6) 0.3128(5) 0.8037(3) 0.0658(19) Uani 1 1 d . . . 
H42A H 0.8070 0.2842 0.8303 0.099 Uiso 1 1 calc R . . 
H42B H 0.9396 0.2509 0.7795 0.099 Uiso 1 1 calc R . . 
H42C H 0.8522 0.3723 0.7711 0.099 Uiso 1 1 calc R . . 
C43 C 0.7100(5) 0.6583(4) 0.6404(3) 0.0362(13) Uani 1 1 d . . . 
C44 C 0.6522(5) 0.6055(4) 0.6032(3) 0.0422(14) Uani 1 1 d . . . 
C45 C 0.7021(5) 0.5995(4) 0.5353(3) 0.0472(15) Uani 1 1 d . . . 
H45A H 0.6634 0.5676 0.5098 0.057 Uiso 1 1 calc R . . 
C46 C 0.8081(5) 0.6378(5) 0.5000(3) 0.0479(15) Uani 1 1 d . . . 
C47 C 0.8651(5) 0.6828(4) 0.5349(3) 0.0441(15) Uani 1 1 d . . . 
H47A H 0.9377 0.7060 0.5116 0.053 Uiso 1 1 calc R . . 
C48 C 0.8192(5) 0.6968(4) 0.6065(3) 0.0398(14) Uani 1 1 d . . . 
C49 C 0.8548(6) 0.6243(5) 0.4232(3) 0.0599(17) Uani 1 1 d . . . 
C50 C 0.9793(7) 0.6527(7) 0.3946(3) 0.105(3) Uani 1 1 d . . . 
H50A H 1.0060 0.6427 0.3458 0.157 Uiso 1 1 calc R . . 
H50B H 1.0385 0.6023 0.4165 0.157 Uiso 1 1 calc R . . 
H50C H 0.9733 0.7313 0.4033 0.157 Uiso 1 1 calc R . . 
C51 C 0.7613(6) 0.7040(5) 0.3898(3) 0.083(2) Uani 1 1 d . . . 
H51A H 0.7891 0.6972 0.3407 0.124 Uiso 1 1 calc R . . 
H51B H 0.7528 0.7821 0.4005 0.124 Uiso 1 1 calc R . . 
H51C H 0.6825 0.6834 0.4068 0.124 Uiso 1 1 calc R . . 
C52 C 0.8663(6) 0.5021(5) 0.4064(3) 0.072(2) Uani 1 1 d . . . 
H52A H 0.8966 0.4946 0.3574 0.108 Uiso 1 1 calc R . . 
H52B H 0.7864 0.4836 0.4220 0.108 Uiso 1 1 calc R . . 
H52C H 0.9233 0.4503 0.4290 0.108 Uiso 1 1 calc R . . 
C53 C 0.5445(5) 0.5539(5) 0.6412(3) 0.0561(17) Uani 1 1 d . . . 
C54 C 0.4996(6) 0.4973(6) 0.5932(3) 0.075(2) Uani 1 1 d . . . 
H54A H 0.5669 0.4391 0.5690 0.113 Uiso 1 1 calc R . . 
H54B H 0.4698 0.5543 0.5606 0.113 Uiso 1 1 calc R . . 
H54C H 0.4334 0.4624 0.6194 0.113 Uiso 1 1 calc R . . 
C55 C 0.5845(6) 0.4638(5) 0.6932(3) 0.0672(19) Uani 1 1 d . . . 
H55A H 0.6541 0.4062 0.6703 0.101 Uiso 1 1 calc R . . 
H55B H 0.5170 0.4283 0.7163 0.101 Uiso 1 1 calc R . . 
H55C H 0.6080 0.4990 0.7264 0.101 Uiso 1 1 calc R . . 
C56 C 0.4364(5) 0.6444(5) 0.6773(3) 0.0698(19) Uani 1 1 d . . . 
H56A H 0.4618 0.6817 0.7087 0.105 Uiso 1 1 calc R . . 
H56B H 0.3701 0.6089 0.7023 0.105 Uiso 1 1 calc R . . 
H56C H 0.4083 0.7005 0.6438 0.105 Uiso 1 1 calc R . . 
  
loop_ 
 _atom_site_aniso_label 
 _atom_site_aniso_U_11 
 _atom_site_aniso_U_22 
 _atom_site_aniso_U_33 
 _atom_site_aniso_U_23 
 _atom_site_aniso_U_13 
 _atom_site_aniso_U_12 
Zn 0.0427(5) 0.0469(5) 0.0357(5) 0.0012(3) -0.0044(3) -0.0096(3) 
O1 0.047(2) 0.045(2) 0.043(3) 0.0025(19) -0.007(2) -0.0032(19) 
O2 0.042(2) 0.050(2) 0.046(3) 0.0013(19) -0.009(2) -0.0127(18) 
O3 0.045(2) 0.041(2) 0.040(3) 0.0042(18) -0.009(2) -0.0063(17) 
O4 0.042(2) 0.049(2) 0.045(3) 0.0037(19) -0.010(2) -0.0125(18) 
N1 0.031(3) 0.028(3) 0.038(3) -0.003(2) -0.010(2) -0.002(2) 
N4 0.034(3) 0.035(3) 0.034(3) 0.002(2) -0.011(2) -0.008(2) 
C1 0.039(4) 0.044(4) 0.031(4) 0.001(3) -0.010(3) -0.021(3) 
C2 0.036(3) 0.043(4) 0.035(4) 0.004(3) -0.006(3) -0.012(3) 
C3 0.029(3) 0.048(4) 0.032(3) 0.000(3) -0.002(3) -0.008(3) 
C4 0.034(3) 0.042(4) 0.046(4) -0.004(3) -0.009(3) -0.005(3) 
C5 0.034(3) 0.043(4) 0.040(4) -0.001(3) -0.009(3) -0.010(3) 
C6 0.024(3) 0.049(4) 0.038(4) -0.008(3) -0.001(3) -0.005(3) 
C7 0.033(3) 0.044(4) 0.040(4) 0.003(3) -0.007(3) -0.005(3) 
C8 0.044(4) 0.091(5) 0.034(4) 0.007(3) 0.001(3) -0.001(3) 
C9 0.064(4) 0.076(5) 0.042(4) -0.016(3) -0.002(3) -0.017(3) 
C10 0.038(4) 0.074(4) 0.055(4) 0.002(3) -0.005(3) -0.011(3) 
C11 0.043(4) 0.043(4) 0.038(4) 0.009(3) -0.002(3) -0.005(3) 
C12 0.052(4) 0.054(4) 0.056(4) 0.019(3) -0.010(3) -0.003(3) 
C13 0.059(4) 0.049(4) 0.066(5) 0.011(3) -0.009(3) -0.016(3) 
C14 0.060(4) 0.069(4) 0.039(4) 0.015(3) -0.010(3) -0.019(3) 
C15 0.045(4) 0.038(3) 0.029(4) 0.002(3) -0.004(3) -0.002(3) 
C16 0.055(4) 0.042(4) 0.040(4) 0.002(3) -0.003(3) -0.009(3) 
C17 0.053(4) 0.046(4) 0.043(4) 0.008(3) -0.002(3) -0.019(3) 
C18 0.042(4) 0.047(4) 0.052(4) 0.001(3) -0.007(3) -0.012(3) 
C19 0.040(4) 0.039(4) 0.046(4) 0.001(3) -0.002(3) -0.010(3) 
C20 0.033(3) 0.041(4) 0.043(4) 0.007(3) -0.002(3) -0.009(3) 
C21 0.047(4) 0.067(4) 0.049(4) -0.014(3) 0.000(3) -0.023(3) 
C22 0.054(4) 0.096(5) 0.046(4) 0.000(4) -0.018(3) -0.019(4) 
C23 0.073(5) 0.113(6) 0.062(5) -0.028(4) -0.001(4) -0.043(4) 
C24 0.074(5) 0.076(5) 0.052(4) -0.022(4) 0.004(4) -0.024(4) 
C25 0.052(4) 0.071(5) 0.047(4) 0.010(3) -0.002(3) -0.020(3) 
C26 0.098(6) 0.166(8) 0.050(5) 0.001(5) 0.008(4) -0.072(6) 
C27 0.095(6) 0.086(6) 0.091(6) 0.025(4) -0.003(5) -0.039(4) 
C28 0.069(5) 0.113(6) 0.066(5) 0.015(4) 0.014(4) -0.006(4) 
C29 0.038(3) 0.039(4) 0.035(4) 0.003(3) -0.009(3) -0.008(3) 
C30 0.038(3) 0.036(3) 0.035(4) 0.002(3) -0.011(3) -0.005(3) 
C31 0.038(3) 0.045(4) 0.029(3) 0.002(3) -0.007(3) -0.008(3) 
C32 0.048(4) 0.039(4) 0.042(4) 0.011(3) -0.016(3) -0.010(3) 
C33 0.033(3) 0.045(4) 0.047(4) 0.004(3) -0.013(3) -0.008(3) 
C34 0.038(3) 0.046(4) 0.021(3) 0.010(3) -0.007(3) -0.019(3) 
C35 0.044(4) 0.052(4) 0.032(4) 0.013(3) -0.009(3) -0.009(3) 
C36 0.073(5) 0.071(4) 0.032(4) 0.003(3) -0.003(3) -0.004(4) 
C37 0.076(5) 0.072(4) 0.039(4) 0.005(3) -0.019(3) -0.026(3) 
C38 0.059(4) 0.058(4) 0.043(4) 0.014(3) -0.009(3) -0.021(3) 
C39 0.053(4) 0.046(4) 0.034(3) 0.001(3) -0.002(3) -0.002(3) 
C40 0.079(5) 0.056(4) 0.064(5) 0.006(4) -0.004(4) 0.020(4) 
C41 0.039(4) 0.074(4) 0.054(4) -0.003(3) -0.003(3) 0.002(3) 
C42 0.088(5) 0.045(4) 0.054(4) -0.008(3) -0.005(4) -0.007(3) 
C43 0.042(4) 0.036(3) 0.027(4) -0.003(3) -0.010(3) -0.001(3) 
C44 0.040(4) 0.046(4) 0.041(4) 0.004(3) -0.014(3) -0.009(3) 
C45 0.053(4) 0.056(4) 0.033(4) -0.003(3) -0.015(3) -0.008(3) 
C46 0.053(4) 0.055(4) 0.034(4) 0.000(3) -0.013(3) -0.008(3) 
C47 0.040(4) 0.051(4) 0.034(4) -0.004(3) 0.000(3) -0.007(3) 
C48 0.037(4) 0.041(3) 0.033(4) 0.003(3) -0.003(3) -0.004(3) 
C49 0.064(4) 0.074(5) 0.043(4) 0.003(3) -0.016(3) -0.018(3) 
C50 0.099(6) 0.173(8) 0.046(5) -0.019(5) 0.012(4) -0.066(6) 
C51 0.123(6) 0.080(5) 0.042(4) 0.009(4) -0.025(4) -0.016(4) 
C52 0.073(5) 0.082(5) 0.052(4) -0.027(4) -0.009(4) 0.002(4) 
C53 0.052(4) 0.077(5) 0.043(4) -0.006(3) -0.010(3) -0.022(4) 
C54 0.074(5) 0.098(6) 0.062(5) -0.013(4) -0.005(4) -0.044(4) 
C55 0.095(5) 0.058(4) 0.057(4) 0.006(3) -0.016(4) -0.040(4) 
C56 0.049(4) 0.100(5) 0.057(4) -0.012(4) -0.007(3) -0.014(4) 
  
_geom_special_details 
; 
 All esds (except the esd in the dihedral angle between two l.s. planes) 
 are estimated using the full covariance matrix.  The cell esds are taken 
 into account individually in the estimation of esds in distances, angles 
 and torsion angles; correlations between esds in cell parameters are only 
 used when they are defined by crystal symmetry.  An approximate (isotropic) 
 treatment of cell esds is used for estimating esds involving l.s. planes. 
; 
  
loop_ 
 _geom_bond_atom_site_label_1 
 _geom_bond_atom_site_label_2 
 _geom_bond_distance 
 _geom_bond_site_symmetry_2 
 _geom_bond_publ_flag 
Zn O4 2.051(3) . ? 
Zn O2 2.055(3) . ? 
Zn O3 2.073(3) . ? 
Zn O1 2.086(3) . ? 
Zn N1 2.098(4) . ? 
Zn N4 2.117(4) . ? 
O1 C6 1.275(6) . ? 
O2 C20 1.277(6) . ? 
O3 C34 1.267(5) . ? 
O4 C43 1.280(6) . ? 
N1 C1 1.345(6) . ? 
N1 C29 1.357(6) . ? 
N4 C15 1.335(6) . ? 
N4 C48 1.348(6) . ? 
C1 C2 1.433(7) . ? 
C1 C6 1.452(7) . ? 
C2 C3 1.358(7) . ? 
C3 C4 1.429(7) . ? 
C3 C7 1.527(7) . ? 
C4 C5 1.359(7) . ? 
C5 C6 1.458(7) . ? 
C5 C11 1.530(7) . ? 
C7 C10 1.533(7) . ? 
C7 C8 1.534(7) . ? 
C7 C9 1.544(7) . ? 
C11 C12 1.533(7) . ? 
C11 C13 1.536(7) . ? 
C11 C14 1.538(7) . ? 
C15 C16 1.427(7) . ? 
C15 C20 1.465(7) . ? 
C16 C17 1.361(7) . ? 
C17 C18 1.432(8) . ? 
C17 C25 1.525(8) . ? 
C18 C19 1.344(7) . ? 
C19 C20 1.453(7) . ? 
C19 C21 1.528(8) . ? 
C21 C23 1.531(7) . ? 
C21 C22 1.533(8) . ? 
C21 C24 1.537(8) . ? 
C25 C28 1.525(8) . ? 
C25 C27 1.525(8) . ? 
C25 C26 1.526(9) . ? 
C29 C30 1.408(7) . ? 
C29 C34 1.462(7) . ? 
C30 C31 1.351(7) . ? 
C31 C32 1.435(7) . ? 
C31 C35 1.527(7) . ? 
C32 C33 1.362(7) . ? 
C33 C34 1.467(7) . ? 
C33 C39 1.520(7) . ? 
C35 C36 1.527(7) . ? 
C35 C37 1.531(7) . ? 
C35 C38 1.533(7) . ? 
C39 C42 1.533(8) . ? 
C39 C41 1.540(7) . ? 
C39 C40 1.552(7) . ? 
C43 C48 1.445(7) . ? 
C43 C44 1.446(7) . ? 
C44 C45 1.362(7) . ? 
C44 C53 1.534(7) . ? 
C45 C46 1.418(7) . ? 
C46 C47 1.346(7) . ? 
C46 C49 1.539(8) . ? 
C47 C48 1.438(7) . ? 
C49 C50 1.530(8) . ? 
C49 C51 1.535(8) . ? 
C49 C52 1.537(8) . ? 
C53 C55 1.528(8) . ? 
C53 C56 1.533(8) . ? 
C53 C54 1.538(8) . ? 
  
loop_ 
 _geom_angle_atom_site_label_1 
 _geom_angle_atom_site_label_2 
 _geom_angle_atom_site_label_3 
 _geom_angle 
 _geom_angle_site_symmetry_1 
 _geom_angle_site_symmetry_3 
 _geom_angle_publ_flag 
O4 Zn O2 155.77(15) . . ? 
O4 Zn O3 90.59(13) . . ? 
O2 Zn O3 93.12(13) . . ? 
O4 Zn O1 93.83(14) . . ? 
O2 Zn O1 92.55(14) . . ? 
O3 Zn O1 155.73(15) . . ? 
O4 Zn N1 102.20(15) . . ? 
O2 Zn N1 101.99(15) . . ? 
O3 Zn N1 77.75(15) . . ? 
O1 Zn N1 77.98(15) . . ? 
O4 Zn N4 77.88(16) . . ? 
O2 Zn N4 78.10(16) . . ? 
O3 Zn N4 106.52(15) . . ? 
O1 Zn N4 97.74(15) . . ? 
N1 Zn N4 175.72(15) . . ? 
C6 O1 Zn 113.4(3) . . ? 
C20 O2 Zn 114.0(3) . . ? 
C34 O3 Zn 113.4(3) . . ? 
C43 O4 Zn 114.7(3) . . ? 
C1 N1 C29 130.9(4) . . ? 
C1 N1 Zn 114.0(3) . . ? 
C29 N1 Zn 115.1(3) . . ? 
C15 N4 C48 132.3(5) . . ? 
C15 N4 Zn 113.9(3) . . ? 
C48 N4 Zn 113.8(3) . . ? 
N1 C1 C2 129.2(5) . . ? 
N1 C1 C6 113.4(5) . . ? 
C2 C1 C6 117.5(5) . . ? 
C3 C2 C1 122.3(5) . . ? 
C2 C3 C4 118.5(5) . . ? 
C2 C3 C7 122.4(5) . . ? 
C4 C3 C7 119.1(5) . . ? 
C5 C4 C3 124.5(5) . . ? 
C4 C5 C6 117.0(5) . . ? 
C4 C5 C11 123.6(5) . . ? 
C6 C5 C11 119.4(5) . . ? 
O1 C6 C1 120.3(5) . . ? 
O1 C6 C5 119.5(5) . . ? 
C1 C6 C5 120.2(5) . . ? 
C3 C7 C10 108.8(4) . . ? 
C3 C7 C8 112.2(4) . . ? 
C10 C7 C8 108.4(4) . . ? 
C3 C7 C9 111.0(4) . . ? 
C10 C7 C9 109.2(4) . . ? 
C8 C7 C9 107.1(5) . . ? 
C5 C11 C12 111.1(4) . . ? 
C5 C11 C13 108.5(4) . . ? 
C12 C11 C13 108.7(4) . . ? 
C5 C11 C14 111.4(4) . . ? 
C12 C11 C14 107.5(4) . . ? 
C13 C11 C14 109.6(5) . . ? 
N4 C15 C16 130.1(5) . . ? 
N4 C15 C20 112.9(5) . . ? 
C16 C15 C20 117.0(5) . . ? 
C17 C16 C15 123.1(5) . . ? 
C16 C17 C18 116.8(5) . . ? 
C16 C17 C25 123.1(6) . . ? 
C18 C17 C25 120.1(5) . . ? 
C19 C18 C17 126.5(5) . . ? 
C18 C19 C20 116.1(5) . . ? 
C18 C19 C21 123.8(5) . . ? 
C20 C19 C21 120.1(5) . . ? 
O2 C20 C19 119.4(5) . . ? 
O2 C20 C15 120.2(5) . . ? 
C19 C20 C15 120.4(5) . . ? 
C19 C21 C23 111.4(5) . . ? 
C19 C21 C22 111.3(5) . . ? 
C23 C21 C22 108.3(5) . . ? 
C19 C21 C24 108.9(5) . . ? 
C23 C21 C24 107.7(5) . . ? 
C22 C21 C24 109.1(5) . . ? 
C17 C25 C28 109.7(5) . . ? 
C17 C25 C27 110.2(5) . . ? 
C28 C25 C27 108.8(6) . . ? 
C17 C25 C26 112.4(5) . . ? 
C28 C25 C26 108.8(6) . . ? 
C27 C25 C26 106.8(6) . . ? 
N1 C29 C30 129.4(5) . . ? 
N1 C29 C34 111.0(4) . . ? 
C30 C29 C34 119.6(4) . . ? 
C31 C30 C29 122.6(5) . . ? 
C30 C31 C32 117.2(5) . . ? 
C30 C31 C35 123.5(5) . . ? 
C32 C31 C35 119.3(4) . . ? 
C33 C32 C31 125.9(5) . . ? 
C32 C33 C34 116.5(5) . . ? 
C32 C33 C39 124.6(5) . . ? 
C34 C33 C39 118.9(5) . . ? 
O3 C34 C29 121.6(4) . . ? 
O3 C34 C33 120.2(5) . . ? 
C29 C34 C33 118.2(5) . . ? 
C36 C35 C31 111.6(4) . . ? 
C36 C35 C37 109.4(5) . . ? 
C31 C35 C37 108.1(4) . . ? 
C36 C35 C38 108.0(5) . . ? 
C31 C35 C38 110.1(4) . . ? 
C37 C35 C38 109.6(4) . . ? 
C33 C39 C42 109.6(5) . . ? 
C33 C39 C41 110.6(4) . . ? 
C42 C39 C41 109.8(5) . . ? 
C33 C39 C40 111.3(5) . . ? 
C42 C39 C40 108.9(5) . . ? 
C41 C39 C40 106.6(5) . . ? 
O4 C43 C48 120.1(5) . . ? 
O4 C43 C44 119.5(5) . . ? 
C48 C43 C44 120.4(5) . . ? 
C45 C44 C43 116.8(5) . . ? 
C45 C44 C53 123.4(5) . . ? 
C43 C44 C53 119.7(5) . . ? 
C44 C45 C46 124.3(5) . . ? 
C47 C46 C45 119.1(5) . . ? 
C47 C46 C49 122.4(5) . . ? 
C45 C46 C49 118.5(5) . . ? 
C46 C47 C48 121.9(5) . . ? 
N4 C48 C47 129.5(5) . . ? 
N4 C48 C43 113.1(5) . . ? 
C47 C48 C43 117.4(5) . . ? 
C50 C49 C51 109.7(6) . . ? 
C50 C49 C52 108.1(5) . . ? 
C51 C49 C52 108.8(5) . . ? 
C50 C49 C46 112.0(5) . . ? 
C51 C49 C46 107.8(5) . . ? 
C52 C49 C46 110.3(5) . . ? 
C55 C53 C56 109.4(5) . . ? 
C55 C53 C44 109.2(5) . . ? 
C56 C53 C44 111.2(5) . . ? 
C55 C53 C54 108.0(5) . . ? 
C56 C53 C54 107.3(5) . . ? 
C44 C53 C54 111.8(5) . . ? 
  
_diffrn_measured_fraction_theta_max    0.985 
_diffrn_reflns_theta_full              20.82 
_diffrn_measured_fraction_theta_full   0.985 
_refine_diff_density_max    0.656 
_refine_diff_density_min   -0.531 
_refine_diff_density_rms    0.071 
